# Supplementary material
Source: Research Square preprint supplement (doi:10.21203/rs.3.rs-8914059/v1)
Supplement: Supplementary file 1 [file 906e200bbb9dce305a2a9ecd.docx]

Additional file 2: Table S2. Crude Validity of Self-reported Cancer Screening Participation Compared to Screening Center Medical Records

| **Cancer site** | **Participants, n** | **TP, n** | **FN, n** | **FP, n** | **TN, n** | **Sensitivity, % (95% CI)** | **Specificity, % (95% CI)** | **PPV, % (95% CI)** | **NPV, % (95% CI)** |
| --- | --- | --- | --- | --- | --- | --- | --- | --- | --- |
| Gastric cancer | 824 | 318 | 13 | 342 | 151 | 96.1  (93.4–97.7) | 30.6  (26.7–34.8) | 48.2  (44.4–52.0) | 92.1  (86.9–95.3) |
| Breast cancer | 771 | 276 | 12 | 369 | 114 | 95.8  (92.9–97.6) | 23.6  (20.0–27.6) | 42.8  (39.0–46.6) | 90.5  (84.1–94.5) |
| Colorectal cancer | 1,151 | 322 | 22 | 577 | 230 | 93.6  (90.5–95.7) | 28.5  (25.5–31.7) | 35.8  (32.7–39.0) | 91.3  (87.1–94.2) |
| Cervical cancer | 771 | 442 | 17 | 172 | 140 | 96.3  (94.1–97.7) | 44.9  (39.4–50.4) | 72.0  (68.3–75.4) | 89.2  (83.3–93.1) |

TP, true positive; FN, false negative; FP, false positive; TN, true negative; PPV, positive predictive value; NPV, negative predictive value; CI, confidence interval. The sensitivity, specificity, PPV, and NPV were calculated using the medical records of the Miyagi Cancer Society Screening Center as reference standards.
